# Supplementary material
Source: MDPI journal article supplement (https://www.mdpi.com/2073-4352/9/7/363)
Supplement: s1 [file s1]

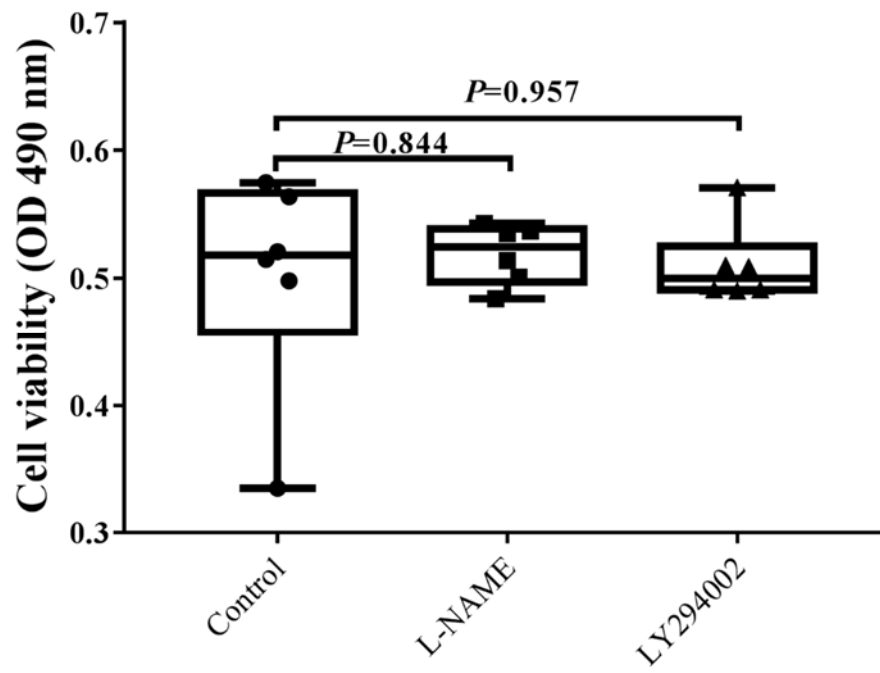

Figure S1. Effects of LY294002 or L-NAME on cell viability of EPCs.
